# Supplementary material for: Facile synthesis of an organic/inorganic hybrid 2D structure tincone film by molecular layer deposition
Source: Royal Society of Chemistry journal article supplement (doi:10.1039/d1dt02984c), 2021-12-21
Supplement: d1dt02984c1.pdf [file d1dt02984c1.pdf]

## Supporting Information

# Facile synthesis of organic/inorganic hybrid 2D structure tincone film by molecular layer deposition

GeonHo Baek <sup>a</sup>, Seunghwan Lee <sup>b</sup>, Hye-mi Kim <sup>b</sup>, Su Hwan Choi <sup>a</sup> and Jin-Seong Park<sup>\*a,b</sup>

<sup>a</sup> Division of Nano-Scale Semiconductor Engineering, Hanyang University, 222 Wangsimni-ro, Seongdong-gu, Seoul 04763, Republic of Korea

<sup>b</sup> Division of Materials Science and Engineering, Hanyang University, 222 Wangsimni-ro, Seongdong-gu, Seoul 04763, Republic of Korea

\* Corresponding author

E-mail: jsparklime@hanyang.ac.kr (Jin-Seong Park)



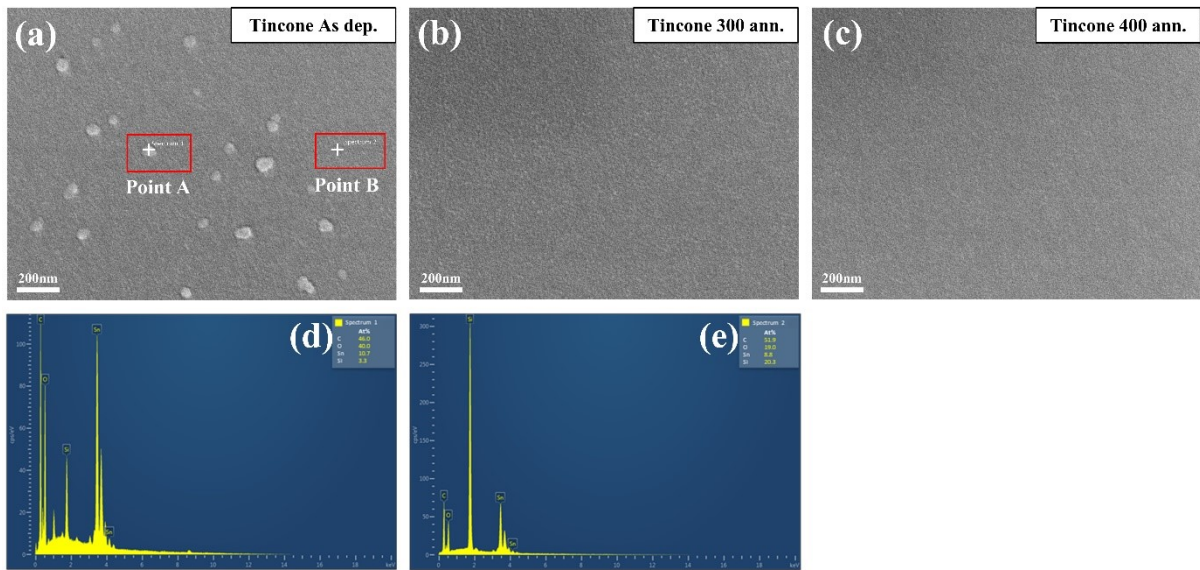

**Fig. S1.** Analysis of surface morphology of tincone thin film using SEM (a) As-dep tincone, (b) 300 °C post annealed tincone and (c) 400 °C post annealed tincone. (d) Point A and (e) Point B of as-dep tincone surface on EDS analysis.

| Point No. | Si   | Sn   | O    | C    | Sn : O : C    |
|-----------|------|------|------|------|---------------|
| Point A   | 3.3  | 10.7 | 40.0 | 46.0 | 1 : 3.7 : 4.3 |
| Point B   | 20.3 | 8.8  | 19.0 | 51.9 | 1 : 2.2 : 5.9 |

**Table. S1.** The EDS composition of point A and point B on as-dep tincone surfaces.

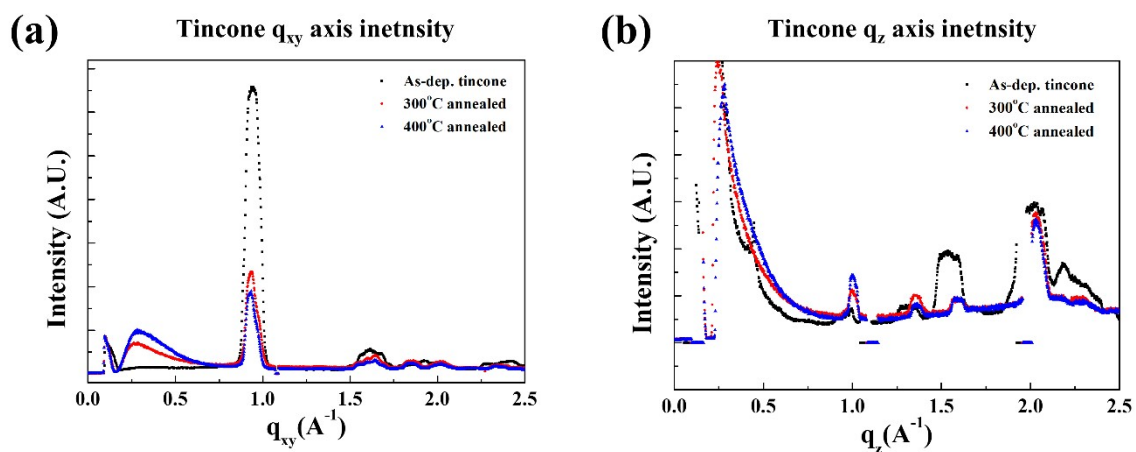

**Fig. S2.** (a)  $q_{xy}$  and (b)  $q_z$  line peak intensities from the WAXS image of the tincone sample.
